# Supplementary material for: Genetic background of primary and familial HLH in Qatar: registry data and population study
Source: PubMed Central journal article supplement (PMC11130942; doi:10.3389/fped.2024.1326489), 2024-05-09
Supplement: Table1.pdf [file Table1.pdf]

**SUPPLEMENTARY TABLE 1** Enriched variants in QGP unrelated samples compared to gnomAD database.

| Gene          | Mutation                  | AF (QGP UNRELATED) | AF (gnomAD) | OR    | CI (lower) | CI (upper) | P- value  | adj-p value |
|---------------|---------------------------|--------------------|-------------|-------|------------|------------|-----------|-------------|
| <i>UNC13D</i> | NM_199242.3: c.3260C>T    | 0.083              | 0.049       | 1.71  | 1.59       | 1.84       | 2.20E-43  | 9.45E-43    |
| <i>UNC13D</i> | NM_199242.3:c.2943G>A     | 0.073              | 0.052       | 1.41  | 1.31       | 1.52       | 3.20E-18  | 6.26E-18    |
| <i>UNC13D</i> | NM_199242.3:c.2299-46C>T  | 0.279              | 0.125       | 2.22  | 2.13       | 2.32       | 7.30E-270 | 8.56E-269   |
| <i>UNC13D</i> | NR_199242.3: c.4916T>C    | 0.317              | 0.139       | 2.28  | 2.19       | 2.37       | 3.0E-318  | 4.71E-317   |
| <i>UNC13D</i> | NM_199242.3: c.58C>T      | 0.078              | 0.058       | 1.35  | 1.25       | 1.45       | 2.20E-15  | 4.06E-15    |
| <i>UNC13D</i> | NM_199242.3: c.3260C>T    | 0.048              | 0.002       | 29.25 | 25.55      | 33.5       | 0.00E+00  | 0.00E+00    |
| <i>RAB27A</i> | NM_183235.3:c.*14C>T      | 0.222              | 0.193       | 1.15  | 1.1        | 1.21       | 8.90E-10  | 1.16E-09    |
| <i>LYST</i>   | NM_000081.4:c.10564+43G>A | 0.45               | 0.42        | 1.07  | 1.03       | 1.11       | 1.30E-04  | 1.56E-04    |
| <i>LYST</i>   | NM_000081.4:c.5023+41C>T  | 0.14               | 0.104       | 1.34  | 1.27       | 1.42       | 1.60E-24  | 3.77E-24    |
| <i>LYST</i>   | NM_000081.4:c.4392C>T     | 0.125              | 0.088       | 1.42  | 1.34       | 1.5        | 3.40E-30  | 1.01E-29    |
| <i>LYST</i>   | NM_000081.4:c.2355T>C     | 0.141              | 0.105       | 1.35  | 1.27       | 1.42       | 3.60E-25  | 9.27E-25    |
| <i>AP3B1</i>  | NM_003664.4:c.280-28T>C   | 0.409              | 0.324       | 1.26  | 1.22       | 1.31       | 3.20E-36  | 1.08E-35    |
| <i>FAM71B</i> | NM_130899.2:c.1691T>C     | 0.187              | 0.108       | 1.73  | 1.65       | 1.82       | 7.40E-97  | 3.48E-96    |
| <i>MED7</i>   | NM_130899.3:c.921T>C      | 0.23               | 0.126       | 1.83  | 1.75       | 1.91       | 1.20E-137 | 9.63E-137   |
| <i>ITK</i>    | NM_005546.3:c.495+22G>A   | 0.288              | 0.27        | 1.07  | 1.02       | 1.11       | 2.10E-03  | 2.41E-03    |
| <i>ITK</i>    | NM_005546.3:c.647+28C>T   | 0.085              | 0.068       | 1.26  | 1.17       | 1.35       | 2.00E-10  | 2.66E-10    |
| <i>ITK</i>    | NM_005546.3:c.1232+19G>A  | 0.068              | 0.054       | 1.26  | 1.17       | 1.36       | 5.40E-09  | 6.86E-09    |
| <i>ITK</i>    | NM_005546.3:c.1792-41T>C  | 0.438              | 0.409       | 1.07  | 1.04       | 1.11       | 9.20E-05  | 1.11E-04    |

Abbreviations: AF, allelic frequency; CI, confidence of intervals; gnomAD, genome aggregation database; OR, odds ratio; QGP, Qatar Genome Programme.
